# Supplementary material for: Detection and characterization of chicken anemia virus from commercial broiler breeder chickens
Source: PubMed Central journal article supplement (PMC2605446; doi:10.1186/1743-422x-5-128), 2008-10-27
Supplement: 1743-422X-5-128-S1.pdf [file 1743-422X-5-128-S1.pdf]

| State              | Farm | Age in weeks | No. of hens tested | No. of organs tested | Distribution of CAV DNA in organs (No. CAV positive/total no. of samples) |                              |                              |                             |                             |                              |                              |
|--------------------|------|--------------|--------------------|----------------------|---------------------------------------------------------------------------|------------------------------|------------------------------|-----------------------------|-----------------------------|------------------------------|------------------------------|
|                    |      |              |                    |                      | Spleen                                                                    | Thymus                       | Bone marrow                  | Liver                       | Duodenum                    | Ovary                        | Oviduct                      |
| Melaka             | MF1  | 31           | 5                  | 35                   | 4/5                                                                       | 3/5                          | 4/5                          | 3/5                         | 2/5                         | 3/5                          | 2/5                          |
|                    | MF3  | 36           | 5                  | 35                   | 5/5                                                                       | 4/5                          | 4/5                          | 2/5                         | 3/5                         | 4/5                          | 3/5                          |
|                    | 1B   | 35           | 5                  | 35                   | 3/5                                                                       | 3/5                          | 4/5                          | 3/5                         | 2/5                         | 4/5                          | 2/5                          |
|                    | 3B   | 35           | 5                  | 35                   | 4/5                                                                       | 4/5                          | 3/5                          | 3/5                         | 3/5                         | 3/5                          | 3/5                          |
| Negeri Sembilan    | NF1  | 25           | 5                  | 35                   | 4/5                                                                       | 4/5                          | 3/5                          | 3/5                         | 2/5                         | 3/5                          | 2/5                          |
|                    | NF2  | 25           | 5                  | 35                   | 3/5                                                                       | 3/5                          | 4/5                          | 2/5                         | 2/5                         | 3/5                          | 3/5                          |
|                    | NF3  | 30           | 5                  | 35                   | 4/5                                                                       | 3/5                          | 3/5                          | 3/5                         | 3/5                         | 2/5                          | 3/5                          |
|                    | NF4  | 34           | 5                  | 35                   | 3/5                                                                       | 4/5                          | 4/5                          | 2/5                         | 2/5                         | 4/5                          | 2/5                          |
| Perak              | PPW  | 30           | 5                  | 35                   | 4/5                                                                       | 2/5                          | 3/5                          | 3/5                         | 2/5                         | 4/5                          | 2/5                          |
|                    | PYT  | 35           | 5                  | 35                   | 3/5                                                                       | 4/5                          | 3/5                          | 3/5                         | 2/5                         | 3/5                          | 2/5                          |
|                    | P12  | 28           | 5                  | 35                   | 4/5                                                                       | 3/5                          | 4/5                          | 3/5                         | 3/5                         | 4/5                          | 3/5                          |
|                    | P24  | 27           | 5                  | 35                   | 4/5                                                                       | 4/5                          | 3/5                          | 2/5                         | 2/5                         | 3/5                          | 2/5                          |
| <b>Total</b>       |      |              | <b>60</b>          | <b>420</b>           | <b>45/60</b>                                                              | <b>41/60</b>                 | <b>42/60</b>                 | <b>32/60</b>                | <b>28/60</b>                | <b>40/60</b>                 | <b>29/60</b>                 |
| <b>Mean % ± SD</b> |      |              |                    |                      | <b>75.0<sup>a</sup>±12.4</b>                                              | <b>68.3<sup>a</sup>±13.4</b> | <b>70.0<sup>a</sup>±10.4</b> | <b>53.3<sup>b</sup>±9.8</b> | <b>46.7<sup>b</sup>±9.8</b> | <b>66.7<sup>a</sup>±13.0</b> | <b>48.3<sup>b</sup>±10.3</b> |
